# Supplementary material for: Sources and Determinants of Discretionary Food Intake in a Cohort of Australian Children Aged 12–14 Months
Source: MDPI journal article supplement (doi:10.3390/ijerph17010080), 2019-12-20
Supplement: s1 [file s1]

**Supplementary Table 1.** Sensitivity analysis: Factors associated with percentage total energy (%TotE) from discretionary foods (mean values and 95% confidence interval) of toddlers with plausible energy intakes ( $n = 703$ ).

| Variables                                 | Unadjusted Mean<br>(%TotE/day) | 95% CI      | <i>p</i> | Adjusted Mean<br>(%TotE/day) | 95% CI      | <i>p</i> |
|-------------------------------------------|--------------------------------|-------------|----------|------------------------------|-------------|----------|
| <b>Total sample</b>                       | 10.6                           | 10.0 – 11.3 |          |                              |             |          |
| <b>Maternal characteristics</b>           |                                |             |          |                              |             |          |
| Maternal age at recruitment (years)       |                                |             | 0.078    |                              |             | 0.031    |
| <25                                       | 12.6                           | 10.4 – 14.8 |          | 11.9                         | 9.3 – 14.6  |          |
| 25–34                                     | 10.5                           | 9.8 – 11.3  |          | 9.5                          | 8.1 – 10.8  |          |
| ≥35                                       | 9.6                            | 8.3 – 11.0  |          | 8.2                          | 6.5 – 9.9   |          |
| Level of education                        |                                |             | 0.001    |                              |             | 0.403    |
| High school/vocational                    | 11.7                           | 10.8 – 12.7 |          | 10.2                         | 8.4 – 11.9  |          |
| Some university and above                 | 9.5                            | 8.7 – 10.4  |          | 9.6                          | 8.1 – 11.1  |          |
| IRSAD <sup>(a)</sup> score                |                                |             | 0.295    |                              |             |          |
| Deciles 1–2 (most disadvantaged)          | 11.4                           | 9.7 – 13.1  |          |                              |             |          |
| Deciles 3–4                               | 11.2                           | 9.7 – 12.6  |          |                              |             |          |
| Deciles 5–6                               | 9.3                            | 7.9 – 10.7  |          |                              |             |          |
| Deciles 7–8                               | 10.3                           | 8.8 – 11.8  |          |                              |             |          |
| Deciles 9–10 (most advantaged)            | 10.7                           | 9.3 – 12.0  |          |                              |             |          |
| Maternal country of birth                 |                                |             | <0.001   |                              |             | <0.001   |
| Australia and New Zealand                 | 11.6                           | 10.8 – 12.3 |          | 12.5                         | 11.3 – 13.7 |          |
| India                                     | 6.4                            | 4.0 – 8.9   |          | 7.7                          | 4.9 – 10.5  |          |
| China                                     | 4.8                            | 2.0 – 7.5   |          | 6.9                          | 3.7 – 10.0  |          |
| UK                                        | 12.3                           | 8.9 – 15.7  |          | 13.0                         | 9.4 – 16.6  |          |
| Asia Other                                | 5.9                            | 3.5 – 8.3   |          | 8.3                          | 5.7 – 10.9  |          |
| Other                                     | 8.9                            | 6.3 – 11.6  |          | 10.8                         | 7.9 – 13.8  |          |
| Age of child when mother returned to work |                                |             | 0.223    |                              |             |          |
| ≤ 6 months                                | 10.6                           | 9.2 – 12.0  |          |                              |             |          |
| Between 6 and 12 months                   | 9.7                            | 8.6 – 10.9  |          |                              |             |          |
| Not returned to work by 12 months         | 11.0                           | 10.1 – 12.0 |          |                              |             |          |
| Number of children                        |                                |             | 0.030    |                              |             | 0.022    |

|                                                  |      |             |       |             |
|--------------------------------------------------|------|-------------|-------|-------------|
| 1                                                | 9.8  | 8.9 – 10.7  | 8.5   | 7.1 – 10.0  |
| 2                                                | 11.0 | 9.9 – 12.1  | 10.2  | 8.5 – 11.8  |
| ≥3                                               | 12.4 | 10.6 – 14.1 | 10.9  | 8.7 – 13.1  |
| Maternal BMI <sup>(b)</sup> (kg/m <sup>2</sup> ) |      |             | 0.308 |             |
| <25                                              | 10.2 | 9.3 – 11.0  |       |             |
| 25–29.99                                         | 10.5 | 9.1 – 12.0  |       |             |
| ≥30                                              | 11.6 | 10.0–13.2   |       |             |
| <b>Child characteristics</b>                     |      |             |       |             |
| Sex                                              |      |             |       |             |
| Male                                             | 10.6 | 9.7 – 11.5  |       |             |
| Female                                           | 10.4 | 9.4 – 11.4  |       |             |
| Age complementary foods introduced (weeks)       |      |             | 0.047 | 0.663       |
| <17                                              | 11.9 | 10.5 – 13.2 | 10.2  | 8.5 – 12.1  |
| 17–25                                            | 10.2 | 9.4 – 10.9  | 9.6   | 8.1 – 11.1  |
| ≥26                                              | 9.3  | 7.2 – 11.4  | 9.7   | 7.34 – 12.0 |

<sup>(a)</sup> IRSAD, Index of Relative Socio-Economic Advantage and Disadvantage, where decile 1 = most disadvantaged and decile 10 = most advantaged. <sup>(b)</sup> BMI Body Mass Index.
